# Supplementary material for: Stabilizing V2O3 in carbon nanofiber flexible films for ultrastable potassium storage
Source: Royal Society of Chemistry journal article supplement (doi:10.1039/d1qi01611c), 2022-01-01
Supplement: d1qi01611c1.pdf [file d1qi01611c1.pdf]

## Supporting Information

### Stabilizing V<sub>2</sub>O<sub>3</sub> in carbon nanofiber flexible films for ultrastable potassium storage

*Ge Yao,<sup>a,b,c</sup> Minxi Lin,<sup>a,b,c</sup> Jie Yang,<sup>a,b,c</sup> Lingzhi Wei,<sup>a,b,c</sup> Heling Niu,<sup>c</sup> Qiquan Luo,<sup>\*a</sup> Fangcai Zheng<sup>\*a,b,c</sup> and Qianwang Chen<sup>d</sup>*

<sup>a</sup>Institutes of Physical Science and Information Technology, Key Laboratory of Structure and Functional Regulation of Hybrid Materials, Anhui University, Hefei, Anhui 230601, People's Republic of China.

<sup>b</sup>Anhui Graphene Engineering Laboratory, Anhui University, Hefei, 230601, China. Key Laboratory of Functional Inorganic Material Chemistry of Anhui Province,

<sup>c</sup>Energy Materials and Devices Key Laboratory of Anhui Province for Photoelectric Conversion, Anhui University, Hefei, 230601, China

<sup>d</sup>Hefei National Laboratory for Physical Science at Microscale, Department of Materials Science & Engineering, University of Science and Technology of China, Hefei, Anhui, 230026, People's Republic of China.

† E-mail: zfcgai@mail.ustc.edu.cn; qluo@ustc.edu.cn.

## Content

|                                                                                                                                                                                                                       |    |
|-----------------------------------------------------------------------------------------------------------------------------------------------------------------------------------------------------------------------|----|
| <b>Experiment</b> .....                                                                                                                                                                                               | 4  |
| <b>Figure S1.</b> Flexibility of the V <sub>2</sub> O <sub>3</sub> /CNF film. ....                                                                                                                                    | 7  |
| <b>Figure S2.</b> (a), (b), (c) Wettability of the C with electrolyte. C electrode materials cannot be quickly and completely infiltrated by electrolyte. ....                                                        | 7  |
| <b>Figure S3</b> (a), (b), (c) Wettability of the V <sub>2</sub> O <sub>3</sub> with electrolyte. V <sub>2</sub> O <sub>3</sub> electrode materials cannot be quickly and completely infiltrated by electrolyte. .... | 8  |
| <b>Figure S4.</b> (a), (b) Wettability of the C with H <sub>2</sub> O. ....                                                                                                                                           | 8  |
| <b>Figure S5.</b> (a), (b) Wettability of the V <sub>2</sub> O <sub>3</sub> with H <sub>2</sub> O. ....                                                                                                               | 9  |
| <b>Figure S6.</b> SEM image for the precursor film of V <sub>2</sub> O <sub>3</sub> /CNF. ....                                                                                                                        | 9  |
| <b>Figure S7.</b> SEM image for the a) precursor film of C and b) C. ....                                                                                                                                             | 10 |
| <b>Figure S8.</b> SEM image for the V <sub>2</sub> O <sub>3</sub> . ....                                                                                                                                              | 10 |
| <b>Figure S9.</b> XRD pattern of V <sub>2</sub> O <sub>3</sub> /CNF and C. ....                                                                                                                                       | 11 |
| <b>Figure S10.</b> XRD pattern of V <sub>2</sub> O <sub>3</sub> . ....                                                                                                                                                | 11 |
| <b>Figure S11.</b> Pore distributions curves of V <sub>2</sub> O <sub>3</sub> /CNF. ....                                                                                                                              | 12 |
| <b>Figure S12.</b> CV curves of C electrode. ....                                                                                                                                                                     | 12 |
| <b>Figure S13.</b> Charge-discharge profiles of C electrode at 0.1 A g <sup>-1</sup> for initial three cycles. ....                                                                                                   | 13 |
| <b>Figure S14.</b> CV curves of V <sub>2</sub> O <sub>3</sub> electrode. ....                                                                                                                                         | 13 |
| <b>Figure S15.</b> Charge-discharge profiles of V <sub>2</sub> O <sub>3</sub> electrode at 0.1 A g <sup>-1</sup> for initial three cycles. ....                                                                       | 14 |
| <b>Figure S16.</b> (a) Rate performance of V <sub>2</sub> O <sub>3</sub> /CNF at different calcination temperature;                                                                                                   |    |

|                                                                                                                              |    |
|------------------------------------------------------------------------------------------------------------------------------|----|
| (b) Rate performance of $V_2O_3/CNF$ with different content of raw material vanadium. ....                                   | 14 |
| <b>Figure S17.</b> Cycle life of C electrode at $1\text{ A g}^{-1}$ . ....                                                   | 15 |
| <b>Figure S18.</b> Ex-situ XRD patterns of $V_2O_3/CNF$ at the first cycle. ....                                             | 15 |
| <b>Figure S19.</b> (a), (b) Element content information of $V_2O_3/CNF$ at different state. ....                             | 16 |
| <b>Figure S20.</b> XPS of discharged $V_2O_3/CNF$ . ....                                                                     | 16 |
| <b>Figure S21.</b> XPS of charged $V_2O_3/CNF$ . ....                                                                        | 17 |
| <b>Figure S22.</b> Partially enlarged TEM images of $V_2O_3/CNF$ film after rate cycles. ....                                | 17 |
| <b>Figure S23.</b> (a) Photo of $V_2O_3@CNF$ electrode at pristine, (b) Photo of $V_2O_3@CNF$ electrodes after cycling. .... | 18 |
| <b>Figure S24.</b> Local Density-of-States of each element for the $V_2O_3/C$ without C-O-V bond. ....                       | 18 |
| <b>Table S1.</b> Electrochemical performance of different anode materials on potassium ion battery, ....                     | 19 |
| <b>Table S2.</b> Coulombic efficiency of the $V_2O_3/CNF$ in initial five cycles. ....                                       | 22 |
| <b>Table S3.</b> Bader charge analysis of $V_2O_3/CNF$ film with C-O-V bond. ....                                            | 22 |
| <b>Reference</b> .....                                                                                                       | 23 |

## Experiment

*Material Synthesis:* All chemicals used in the experiment are analytical grade and were from Macklin without any further purification. The flexible films,  $V_2O_3/CNF$ , were prepared by electrospinning method within thermal calcination. The vanadyl acetylacetonate ( $V(acac)_3$ , 0.2786 g) was first dissolved in DMF to obtain a clear solution. Next, polyacrylonitrile (PAN, FW=150000) was added and continuously stirred overnight at room temperature to form the homogenous solution. Then, an electrospinning process was carried out with the voltage of 30 KV and a distance of 18 cm. Finally, the obtained film was calcined in  $N_2$  atmosphere at 800 °C for 2 h with 10 °C/min. The final product was recorded as vanadium-oxide/carbon nanofibers ( $V_2O_3/CNF$ ). The contrastive sample, carbon nanofibers (C), was prepared by the same method with only PAN. And the vanadium-oxide ( $V_2O_3$ ) was prepared through the  $V(acac)_3$  powder with the same calcination conditions.

*Material Characterization:* XRD measurements were performed using X-ray powder diffraction (XRD, Rigaku Co, Japan, D/MAX- $\gamma$ A) with Cu  $K\alpha$  radiation ( $\lambda=1.54056$  Å) at a scan rate of 8 ° min<sup>-1</sup>. The morphologies were systematically characterized by scanning electron microscopy (SEM, JEOL JSM-6700 M) and transmission electron microscopy (TEM, Hitachi H-800) coupled with energy dispersive X-ray (EDX) analysis. TGA was performed on TGA-5500 in the air from room temperature to 850 °C with a temperature ramp of 10 °C min<sup>-1</sup>. The XPS was performed using (XPS, ESCALAB 250). Raman spectra were tested using Confocal Laser MicroRaman Spectrometer (Via-Reflex/inVia-Reflex).

*Electrochemical Measurements:* The electrochemical properties were evaluated with coin-type cells assembled in an argon-filled glove box ( $O_2$  and  $H_2O < 0.1$  ppm). The  $V_2O_3/CNF$  flexible films were directly used as working electrode with a loading about  $1.15 \text{ mg cm}^{-2}$  and the  $0.636 \text{ cm}^2$  of average area. The half cells with 2032 coin-type were assembled using potassium as counter electrode and glass fiber as separator. The electrolyte was 3 M KFSI dissolved in a mixed solution of ethylene carbonate/propylene carbonate (EC/DEC, 1:1 by volume). Galvanostatic charge/discharge tests were carried out on the Neware CT3008W in the voltage range of 0.01–3.0 V. And the electrochemical performance of  $V_2O_3@CNF$  electrode was based the total mass of  $V_2O_3@CNF$ . Electrochemical impedance spectroscopy (EIS) and Cyclic voltammetry (CV) test were conducted on CHI760E electrochemical workstation. The CV tests were carried out in the potential range of 0.01–3.0 V at different scanning rate.

*DFT calculation:* All calculations were performed using the plane-wave periodic density functional method (DFT) in the Vienna *ab initio* simulation package (VASP)<sup>1,2</sup>. The electron ion interaction was described with the projector augmented wave (PAW) method<sup>3,4</sup>. The electron exchange and correlation energy were treated within the generalized gradient approximation (GGA) in the form of the Perdew-Burke-Ernzerhof (PBE) functional<sup>5</sup>. The cut-off energy was set up to 500 eV. The force convergence was set to be lower than  $0.02 \text{ eV/\AA}$ , and the total energy convergence was set to be smaller than  $10^{-5} \text{ eV}$ . Electron smearing of  $\sigma = 0.05 \text{ eV}$  was used following the the Gaussian scheme.

The Brillouin zone was sampled using Monkhorst–Pack scheme with a k-point mesh of  $3 \times 3 \times 1$  centered at the  $\Gamma$ -centered point for the structural relaxation, and  $3 \times 3 \times 1$  k-point mesh was used for the static calculations of charge density difference and Bader charge,  $9 \times 9 \times 1$  k-point mesh was used for the static calculations of density of states <sup>6</sup>. The structure relaxation was continued until the forces on all the atoms are converged to less than 0.02 eV/Å.

The crystal data of the initial structure comes from the Crystallographic database following article <sup>7</sup>. The optimized lattice constants of graphene and  $V_2O_3$  are 2.52 and  $a=c=5.12$  Å,  $c=13.87$  Å, where the value of  $c/a$  was 2.70. The U parameter was set at 2.68 for V d-electrons <sup>8</sup>. Spin polarized calculations (collinear) were performed (ISPIN=2). Taking into account the paramagnetic characteristics of vanadium oxide where the magnetic moment of vanadium atoms was set to  $2\mu_B$  and the others to  $0\mu_B$  <sup>9,10</sup>. Zero damping DFT-D3 method of Grimme.

The slab model of the most stable  $V_2O_3$  (0001) surface contains nine atomic layers in thickness with 3 bottom layers fixed while relaxing other atoms besides, and a  $2 \times 2$  supercell in the lateral plane is adopted. Graphene with a  $4 \times 4$  supercell. The lattice mismatch is about 1.35%. The vacuum slab was set up to 12 Å.

Considering previous studies on vanadium oxide and the actual preparation conditions and terminations, a (0001) surface with a pure-oxygen exposure terminations and a few V=O terminations were used <sup>11-14</sup>.

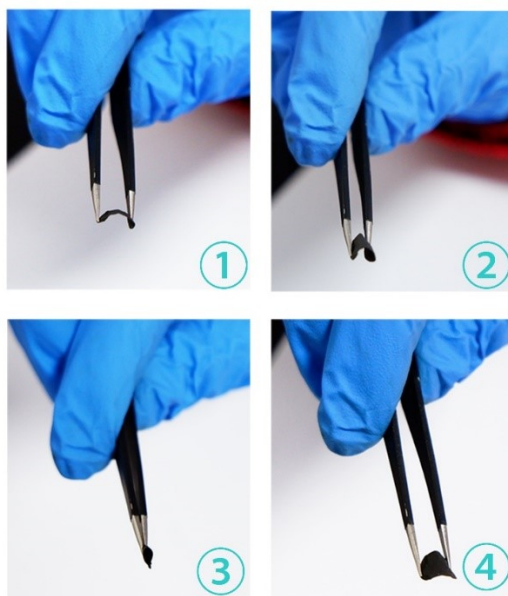

**Figure S1.** Flexibility of the  $V_2O_3/CNF$  film.

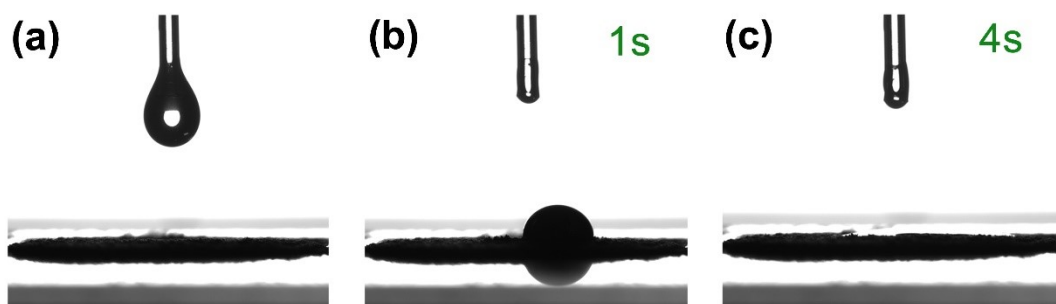

**Figure S2.** (a), (b), (c) Wettability of the C with electrolyte. C electrode materials cannot be quickly and completely infiltrated by electrolyte.

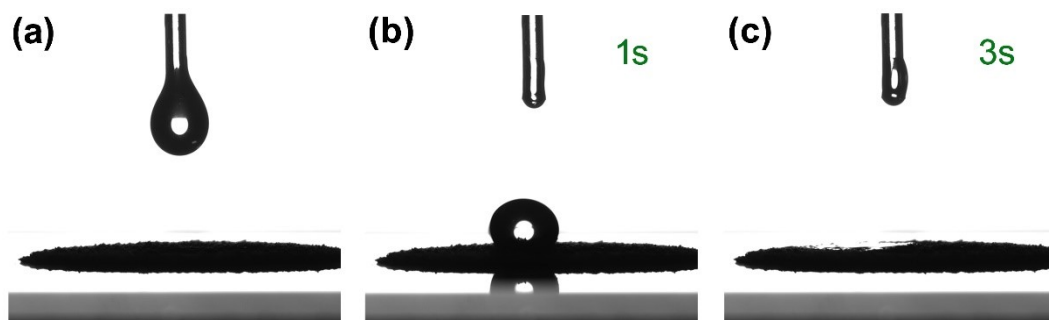

**Figure S3** (a), (b), (c) Wettability of the  $V_2O_3$  with electrolyte.  $V_2O_3$  electrode materials cannot be quickly and completely infiltrated by electrolyte.

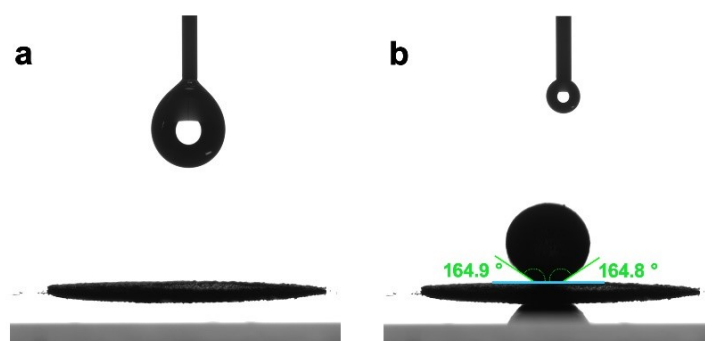

**Figure S4.** (a), (b) Wettability of the C with  $H_2O$ .



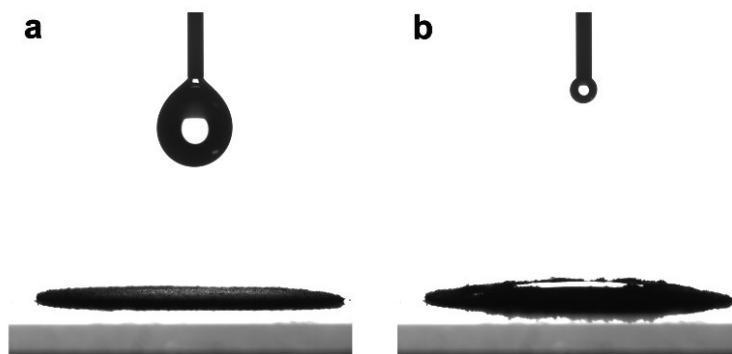

**Figure S5.** (a), (b) Wettability of the V<sub>2</sub>O<sub>3</sub> with H<sub>2</sub>O.

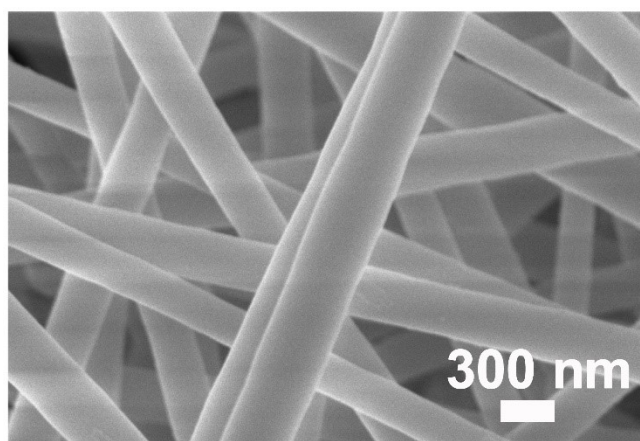

**Figure S6.** SEM image for the precursor film of V<sub>2</sub>O<sub>3</sub>/CNF.

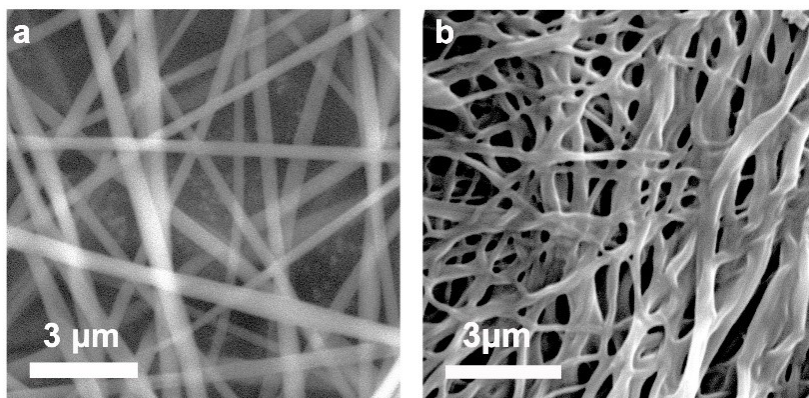

**Figure S7.** SEM image for the a) precursor film of C and b) C.

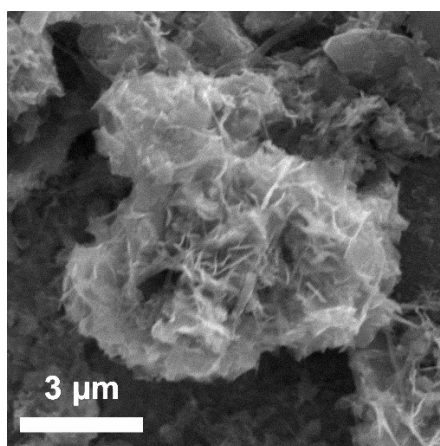

**Figure S8.** SEM image for the V<sub>2</sub>O<sub>3</sub>.

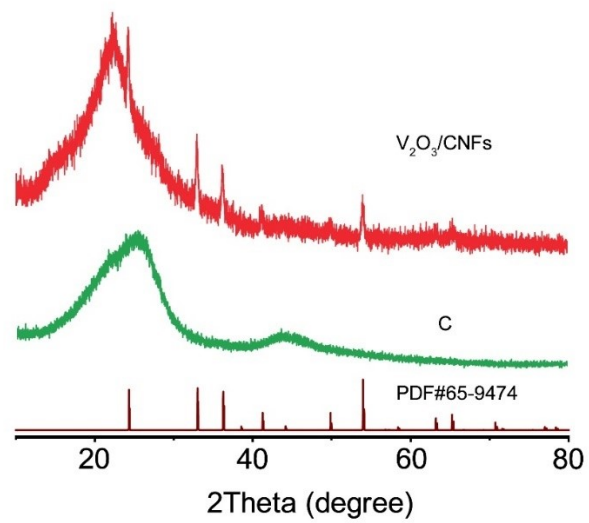

**Figure S9.** XRD pattern of  $V_2O_3/CNF$  and C.

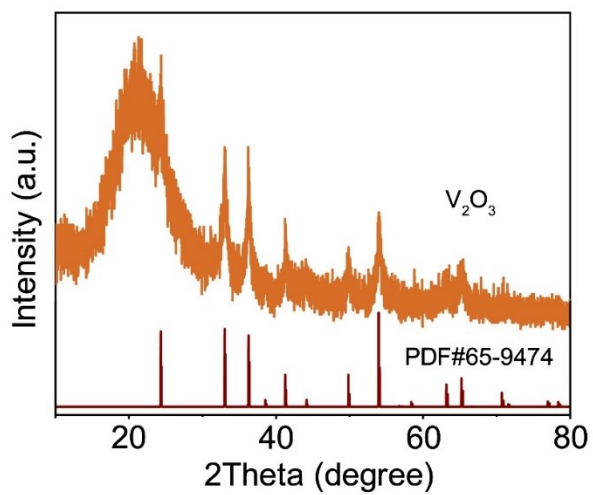

**Figure S10.** XRD pattern of  $V_2O_3$ .

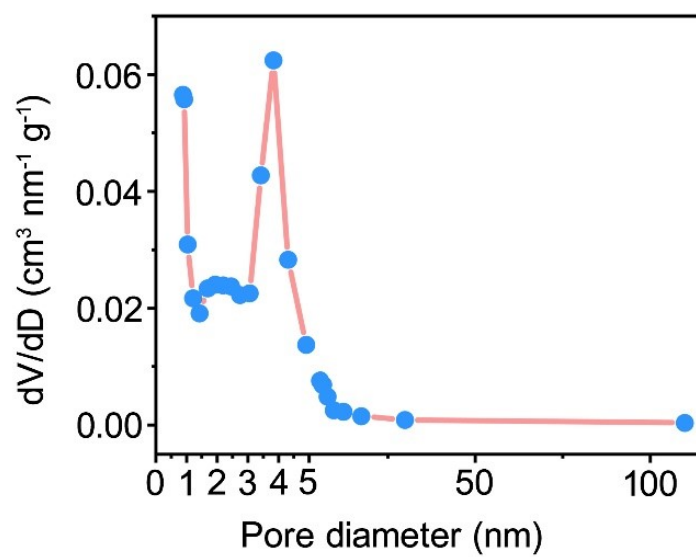

**Figure S11.** Pore distributions curves of V<sub>2</sub>O<sub>3</sub>/CNF.

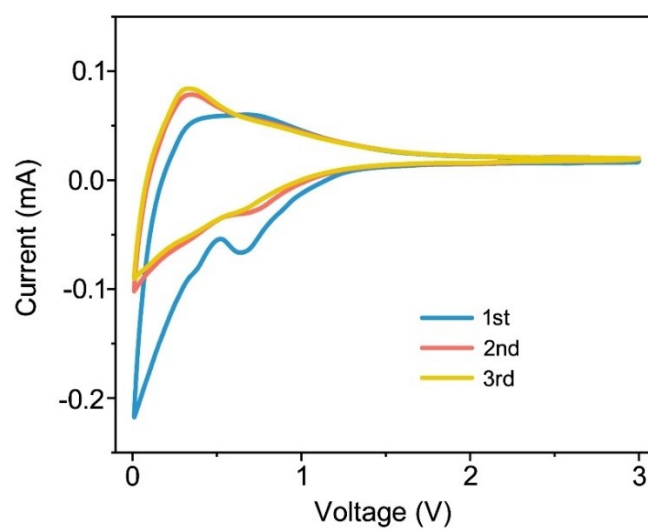

**Figure S12.** CV curves of C electrode.

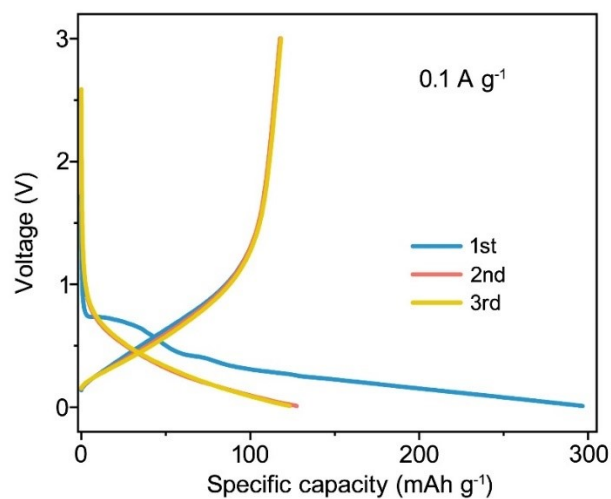

**Figure S13.** Charge-discharge profiles of C electrode at  $0.1 \text{ A g}^{-1}$  for initial three cycles.

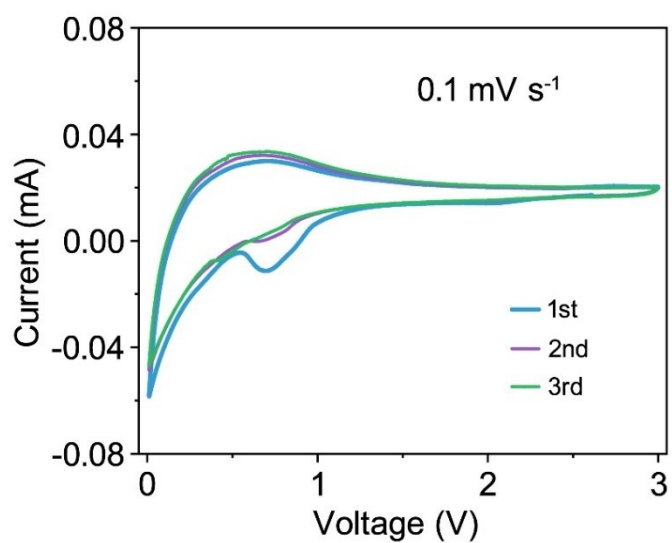

**Figure S14.** CV curves of  $\text{V}_2\text{O}_3$  electrode.

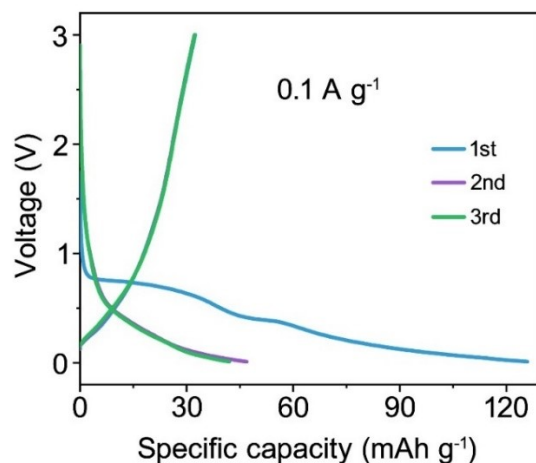

**Figure S15.** Charge-discharge profiles of  $V_2O_3$  electrode at  $0.1 \text{ A g}^{-1}$  for initial three cycles.

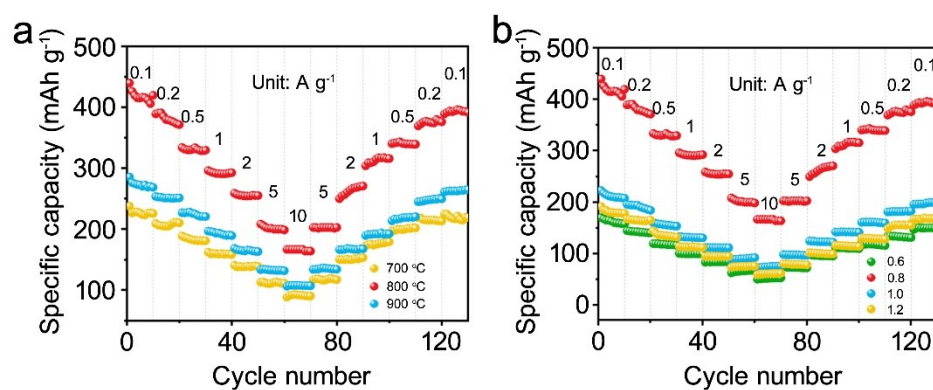

**Figure S16.** (a) Rate performance of  $V_2O_3/CNF$  at different calcination temperature; (b) Rate performance of  $V_2O_3/CNF$  with different content of raw material vanadium.

From Figure S16a, the samples at  $800 \text{ }^\circ\text{C}$  had the best performance, so  $800 \text{ }^\circ\text{C}$  was the best temperature for the formation of the samples. And from Figure S16b, the materials prepared with  $0.8 \text{ mmol}$  had the best electrochemical properties. Thus, the  $800 \text{ }^\circ\text{C}$  with the initial raw material of  $0.8 \text{ mmol}$  are the the best synthesis condition for the  $V_2O_3/CNF$ .

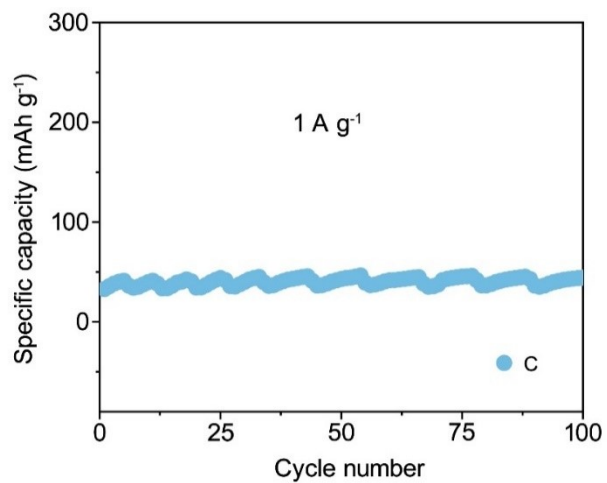

**Figure S17.** Cycle life of C electrode at 1 A g<sup>-1</sup>.

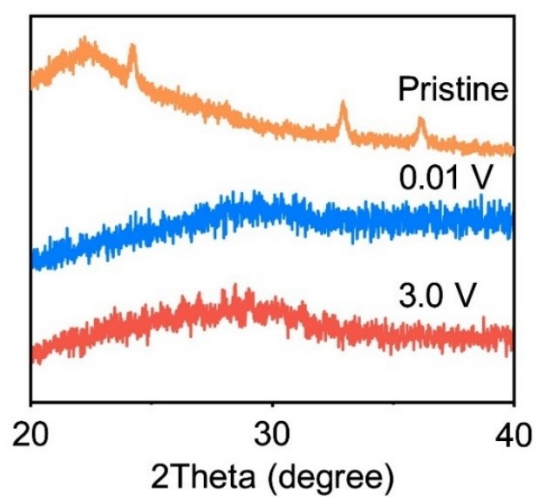

**Figure S18.** Ex-situ XRD patterns of V<sub>2</sub>O<sub>3</sub>/CNF at the first cycle.

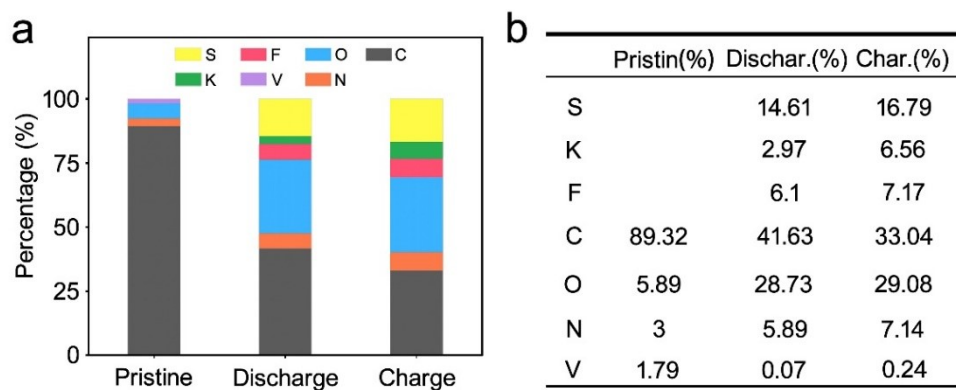

**Figure S19.** (a), (b) Element content information of  $V_2O_3/CNF$  at different state.

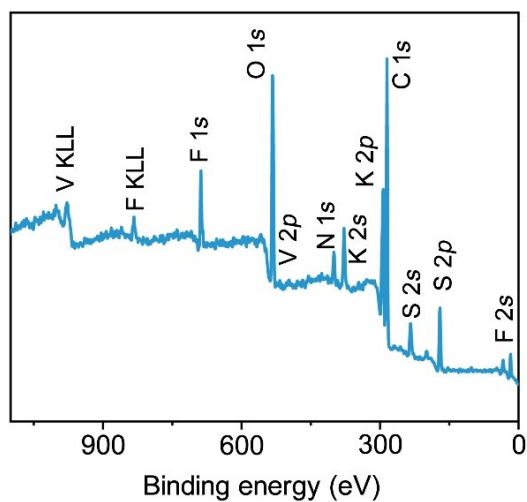

**Figure S20.** XPS of discharged  $V_2O_3/CNF$ .



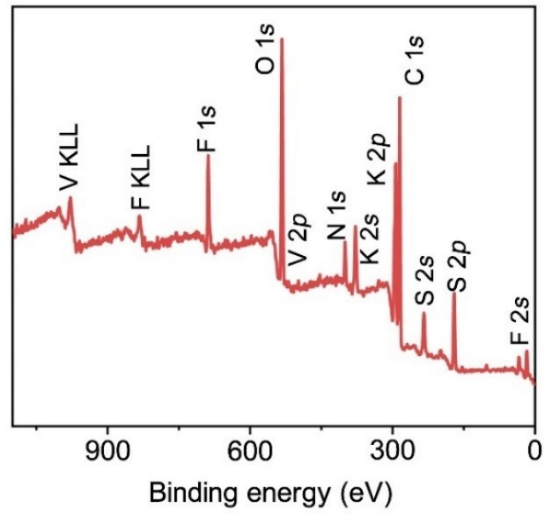

**Figure S21.** XPS of charged  $V_2O_3/CNF$ .

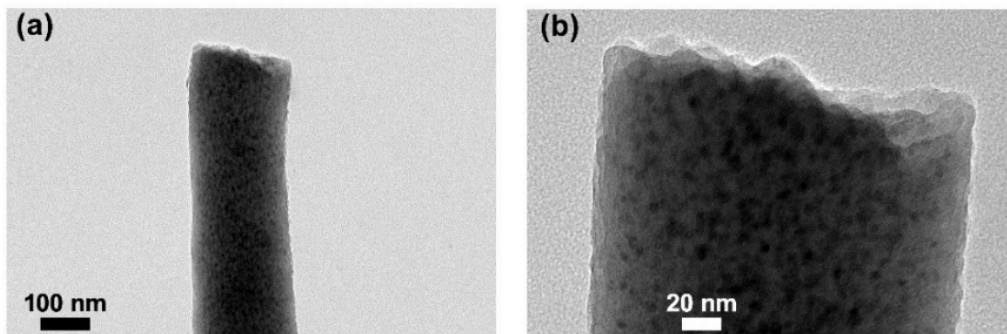

**Figure S22.** Partially enlarged TEM images of  $V_2O_3/CNF$  film after rate cycles.

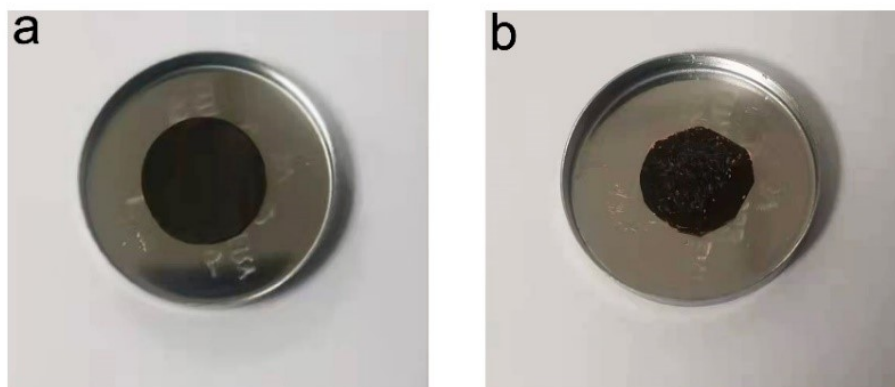

**Figure S23.** (a) Photo of  $V_2O_3@CNF$  electrode at pristine, (b) Photo of  $V_2O_3@CNF$  electrodes after cycling.

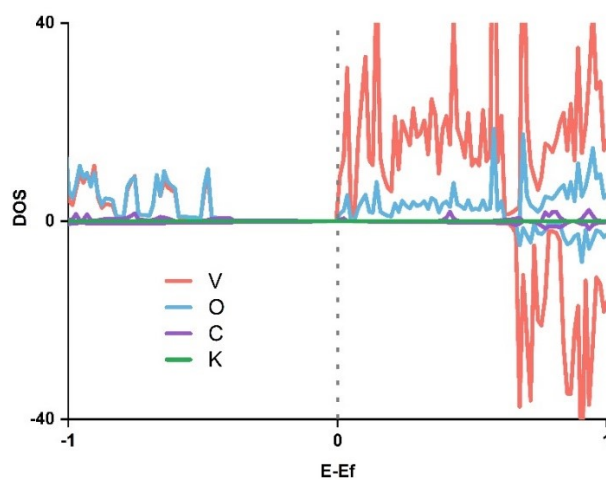

**Figure S24.** Local Density-of-States of each element for the  $V_2O_3/C$  without C-O-V bond.

**Table S1.** Electrochemical performance of different anode materials on potassium ion battery

| <b>Materials</b>                    | <b>Rate capacity<br/>(mAh g<sup>-1</sup>)</b> | <b>Cycle life</b>                                                                        | <b>reference</b> |
|-------------------------------------|-----------------------------------------------|------------------------------------------------------------------------------------------|------------------|
| carbons                             | 133 at 5 A g <sup>-1</sup>                    | the retention of 81% at 1 A g <sup>-1</sup> over 400 cycles                              | <b>15</b>        |
| flower like-<br>NiS <sub>2</sub>    | 190 at 2 A g <sup>-1</sup>                    | 239 mAh g <sup>-1</sup> after 500 cycles at 1 A g <sup>-1</sup>                          | <b>16</b>        |
| CuP <sub>2</sub> /Cu<br>nanowire    | 101 at 10 A g <sup>-1</sup> ,                 | 392 mAh g <sup>-1</sup> with retention of 99.5% after 50 cycles at 0.1 A g <sup>-1</sup> | <b>17</b>        |
| MnCo <sub>2</sub> O <sub>4</sub>    | 152 at 1A g <sup>-1</sup>                     | 126 mAh g <sup>-1</sup> over 200 cycles at 0.1A g <sup>-1</sup>                          | <b>18</b>        |
| Co <sub>3</sub> O <sub>4</sub> @N-C | 80 at 2 C                                     | 213 mAh g <sup>-1</sup> after 740 cycles at 0.5 A g <sup>-1</sup> ,                      | <b>19</b>        |

|                                    |                                 |                                                                                                                         |    |
|------------------------------------|---------------------------------|-------------------------------------------------------------------------------------------------------------------------|----|
|                                    |                                 | 327.5 mAh g <sup>-1</sup> after 300                                                                                     |    |
| Bi@N-CNCs                          | 235.5 at 10 A g <sup>-1</sup> , | cycles at 1 A g <sup>-1</sup> ; 224 mAh g <sup>-1</sup> with retention of 95.3% at 5 A g <sup>-1</sup> over 1200 cycles | 20 |
|                                    |                                 | 407 mAh g <sup>-1</sup> after 550                                                                                       |    |
| Co <sub>3</sub> Se <sub>4</sub> QD | 154 at 5 A g <sup>-1</sup> ,    | cycles at 0.1 A g <sup>-1</sup> ; 200 mAh g <sup>-1</sup> at 1 A g <sup>-1</sup> after 10000 cycles                     | 21 |
|                                    |                                 | 121.7 mAh g <sup>-1</sup> after 600                                                                                     |    |
| Bi <sub>2</sub> MoO <sub>6</sub>   | 165.3 at 0.5 A g <sup>-1</sup>  | cycles at 0.1 A g <sup>-1</sup>                                                                                         | 22 |
|                                    |                                 | 317 mAh g <sup>-1</sup> after 1200                                                                                      |    |
| CuS <sub>2</sub> @NC               | 257 at 6 A g <sup>-1</sup>      | cycles at 1 A g <sup>-1</sup>                                                                                           | 23 |
|                                    |                                 | the retention of 92.4% at 1.0                                                                                           |    |
| soft carbon                        | 115 at 5.0 A g <sup>-1</sup>    | A g <sup>-1</sup> after 1000 cycles                                                                                     | 24 |
|                                    |                                 | 174 mA h g <sup>-1</sup> at 1 A g <sup>-1</sup>                                                                         |    |
| Cu <sub>3</sub> P                  | -                               | after 300 cycles                                                                                                        | 25 |
|                                    |                                 | 181 mAh g <sup>-1</sup> after 5700                                                                                      |    |
| BiSb@TCS                           | 119.3 at 6 A g <sup>-1</sup>    | cycles at 2 A g <sup>-1</sup> ,                                                                                         | 26 |

|              |                              |                                                                                                                                    |                  |
|--------------|------------------------------|------------------------------------------------------------------------------------------------------------------------------------|------------------|
| $V_2O_3@C$   | 116.6 at 5 A g <sup>-1</sup> | 147.9 mAh g <sup>-1</sup> after 1800 cycles at 2 A g <sup>-1</sup>                                                                 | <b>27</b>        |
| $VO/C$       | 104 at 15 A g <sup>-1</sup>  | 345 mAh g <sup>-1</sup> at 0.1 A g <sup>-1</sup> after 400 cycles; 241 mAh g <sup>-1</sup> at 1 A g <sup>-1</sup> over 1000 cycles | <b>28</b>        |
| $V_2O_3/CNF$ | 175 at 10 A g <sup>-1</sup>  | 380 mAh g <sup>-1</sup> after 500 cycles at 0.1 A g <sup>-1</sup> ; the retention of 98% after 2500 cycles at 1 A g <sup>-1</sup>  | <b>This work</b> |

---

**Table S2.** Coulombic efficiency of the V<sub>2</sub>O<sub>3</sub>/CNF in initial five cycles.

| Cycle number | Coulombic efficiency (%) |
|--------------|--------------------------|
| 1            | 27.9                     |
| 2            | 86.7                     |
| 3            | 95.6                     |
| 4            | 98.4                     |
| 5            | 99.2                     |

**Table S3.** Bader charge analysis of V<sub>2</sub>O<sub>3</sub>/CNF film with C-O-V bond

| No. /Element     | V      | O      | C      | K     |
|------------------|--------|--------|--------|-------|
| Sun              | 53.50  | 255.11 | 123.26 | 8.13  |
| Gains and Losses | -14.50 | 40.89  | -0.74  | -0.87 |

## Reference

- 1 G. Kresse and J. Furthmüller, Efficiency of ab-initio total energy calculations for metals and semiconductors using a plane-wave basis set, *Comp. Mater. Sci.* , 1996, **6**, 15-50.
- 2 G. Kresse and J. Furthmüller, Efficient iterative schemes for ab initio total-energy calculations using a plane-wave basis set, *Phys. Rev. B*, 1996, **54**, 11169-11186.
- 3 P. E. Blochl, Projector augmented-wave method, *Phys Rev B Condens Matter*, 1994, **50**, 17953-17979.
- 4 G. Kresse and D. Joubert, From ultrasoft pseudopotentials to the projector augmented-wave method, *Phys. Rev. B*, 1999, **59**, 1758-1775.
- 5 John P. Perdew, Kieron Burke and M. Ernzerhof, Generalized Gradient Approximation Made Simple, *Phys. Rev. Lett.*, 1996, **77**.
- 6 S. Grimme, J. Antony, S. Ehrlich and H. Krieg, A consistent and accurate ab initio parametrization of density functional dispersion correction (DFT-D) for the 94 elements H-Pu, *J Chem Phys*, 2010, **132**, 154104.
- 7 Patrick Rozier, Alicja Ratuszna and J. Galy., Comparative Structural and Electrical Studies of  $V_2O_3$  and  $V_{2-x}Ni_xO_3$  ( $0 < x < 0.75$ ) Solid Solution, *Z. Anorg. Allg. Chem.*, 2002, **628**, 1236-1242.
- 8 R. Tran, X.-G. Li, S. P. Ong, Y. Kalcheim and I. K. Schuller, Metal-insulator transition in  $V_2O_3$  with intrinsic defects, *Phys. Rev. B*, 2021, **103**, 075134.
- 9 L. Hu, C. Xie, S. J. Zhu, M. Zhu, R. H. Wei, X. W. Tang, W. J. Lu, W. H. Song, J. M. Dai, R. R. Zhang, C. J. Zhang, X. B. Zhu and Y. P. Sun, Unveiling the

- mechanisms of metal-insulator transitions in  $V_2O_3$ : The role of trigonal distortion, *Phys. Rev. B*, 2021, **103**, 085119.
- 10 A. S. M. Jonayat, A. Kramer, L. Bignardi, P. Lacovig, S. Lizzit, A. C. T. van Duin, M. Batzill and M. J. Janik, A first-principles study of stability of surface confined mixed metal oxides with corundum structure ( $Fe_2O_3$ ,  $Cr_2O_3$ ,  $V_2O_3$ ), *Phys Chem Chem Phys*, 2018, **20**, 7073-7081.
  - 11 F. E. Feiten, J. Seifert, J. Paier, H. Kuhlenbeck, H. Winter, J. Sauer and H. J. Freund, Surface structure of  $V_2O_3(0001)$  revisited, *Phys Rev Lett*, 2015, **114**, 216101.
  - 12 F. E. Feiten, H. Kuhlenbeck and H.-J. Freund, Surface Structure of  $V_2O_3(0001)$ : A Combined I/V-LEED and STM Study, *J. Phys. Chem. C*, 2015, **119**, 22961-22969.
  - 13 F. Pfuner, J. Schoiswohl, M. Sock, S. Surnev, M. G. Ramsey and F. P. Netzer, The metal-insulator transition in  $V_2O_3(0001)$  thin films: surface termination effects, *J. Phys.-Condens. Mat.*, 2005, **17**, 4035-4047.
  - 14 G. Kresse, S. Surnev, J. Schoiswohl and F. P. Netzer,  $V_2O_3(0001)$  surface terminations: a density functional study, *Surface Science*, 2004, **555**, 118-134.
  - 15 X. Ma, N. Xiao, J. Xiao, X. Song, H. Guo, Y. Wang, S. Zhao, Y. Zhong and J. Qiu, Nitrogen and phosphorus dual-doped porous carbons for high-rate potassium ion batteries, *Carbon*, 2021, **179**, 33-41.



- 16 S. Liang, H. Shi, Z. Yu, Q. Liu, K. Cai, J. Wang and Z. Xu, Uncovering the design principle of conversion-based anode for potassium ion batteries via dimension engineering, *Energy Storage Materials*, 2021, **34**, 536-544.
- 17 S.-B. Huang, Y.-Y. Hsieh, K.-T. Chen and H.-Y. Tuan, Flexible nanostructured potassium-ion batteries, *Chem. Eng. J.*, 2021, **416**, 127697.
- 18 R. Huang, J. Lin, J. Zhou, E. Fan, X. Zhang, R. Chen, F. Wu and L. Li, Hierarchical Triple-Shelled  $\text{MnCo}_2\text{O}_4$  Hollow Microspheres as High-Performance Anode Materials for Potassium-Ion Batteries, *Small*, 2021, **17**, 2007597.
- 19 D. Adekoya, H. Chen, H. Y. Hoh, T. Gould, M. J. T. Balogun, C. Lai, H. Zhao and S. Zhang, Hierarchical  $\text{Co}_3\text{O}_4$ @N-Doped Carbon Composite as an Advanced Anode Material for Ultrastable Potassium Storage, *ACS Nano*, 2020, **14**, 5027-5035.
- 20 Z. Sun, Y. Liu, W. Ye, J. Zhang, Y. Wang, Y. Lin, L. Hou, M. S. Wang and C. Yuan, Unveiling Intrinsic Potassium Storage Behaviors of Hierarchical Nano  $\text{Bi}$ @N-Doped Carbon Nanocages Framework via In Situ Characterizations, *Angew Chem Int Ed Engl*, 2021, **60**, 7180-7187.
- 21 N. Hussain, M. Li, B. Tian and H. Wang,  $\text{Co}_3\text{Se}_4$  Quantum Dots as an Ultrastable Host Material for Potassium-Ion Intercalation, *Adv Mater*, 2021, **33**, 2102164.

- 22 J. Hu, Y. Xie, J. Zheng, Y. Lai and Z. Zhang, Unveiling nanoplates-assembled  $\text{Bi}_2\text{MoO}_6$  microsphere as a novel anode material for high performance potassium-ion batteries, *Nano Research*, 2020, **13**, 2650-2657.
- 23 Q. Peng, S. Zhang, H. Yang, B. Sheng, R. Xu, Q. Wang and Y. Yu, Boosting Potassium Storage Performance of the  $\text{Cu}_2\text{S}$  Anode via Morphology Engineering and Electrolyte Chemistry, *ACS Nano*, 2020, **14**, 6024-6033
- 24 Q. Liu, F. Han, J. Zhou, Y. Li, L. Chen, F. Zhang, D. Zhou, C. Ye, J. Yang, X. Wu and J. Liu, Boosting the Potassium-Ion Storage Performance in Soft Carbon Anodes by the Synergistic Effect of Optimized Molten Salt Medium and N/S Dual-Doping, *ACS Appl Mater Interfaces*, 2020, **12**, 20838-20848.
- 25 Q. Yang, Z. Tai, Q. Xia, W. Lai, W. Wang, B. Zhang, Z. Yan, J. Peng, H. Yang, H. Liu, Q. Gu, S. Chou and H. Liu, Copper phosphide as a promising anode material for potassium-ion batteries, *J. Mater. Chem. A*, 2021, **9**, 8378-8385.
- 26 C. Huang, A. Xu, G. Li, H. Sun, S. Wu, Z. Xu and Y. Yan, Alloyed BiSb Nanoparticles Confined in Tremella-Like Carbon Microspheres for Ultralong-Life Potassium Ion Batteries, *Small*, 2021, **17**, 2100685.
- 27 J. Hu, Y. Xie, J. Zheng, H. Li, T. Wang, Y. Lai and Z. Zhang, Encapsulating  $\text{V}_2\text{O}_3$  Nanoparticles in Hierarchical Porous Carbon Nanosheets via C-O-V Bonds for Fast and Durable Potassium-Ion Storage, *ACS Appl Mater Interfaces*, 2021, **13**, 12149-12158.
- 28 J. Lu, C. Wang, G. Xia, H. Tong, Y. Yang, D. Zhu and Q. Chen, A robust spring-like lamellar VO/C nanostructure for high-rate and long-life potassium-ion

batteries, *J. Mater. Chem. A*, 2020, **8**, 23939-23946.
